# Supplementary material for: Construction of a rice glycoside hydrolase phylogenomic database and identification of targets for biofuel research
Source: Front Plant Sci. 2013 Aug 26;4:330. doi: 10.3389/fpls.2013.00330 (PMC3752443; doi:10.3389/fpls.2013.00330)
Supplement: Table S1 — List of monocot and rice-diverged glycoside hydrolase genes of rice. [file DataSheet1.XLSX]

## Sheet: Sheet1
Table A1. List of monocot and rice-diverged glycoside hydrolase genes of rice.
MSU/TIGR V6 Locus	Family	Rice-diverged	Orthologs in Brachypodium distachyon	Orthologs in Panicum virgatum	Orthologs in Sorghum bicolor	Orthologs in Zea mays
LOC_Os03g49600	GH1	#N/A	Bradi1g10930.2			GRMZM2G118003_P01
LOC_Os03g49610	GH1	#N/A	Bradi1g10940.1	12929.m00006	Sb01g010825	AC217401.3_FGP002
LOC_Os04g39814	GH1	#N/A
LOC_Os04g43380	GH1	Rice-diverged
LOC_Os04g43390	GH1	#N/A	Bradi5g15540.1		Sb06g022490	GRMZM2G457040_P03
LOC_Os04g43400	GH1	Rice-diverged
LOC_Os05g30390	GH1	Rice-diverged
LOC_Os06g46940	GH1	#N/A
LOC_Os07g46280	GH1	#N/A
LOC_Os08g39860	GH1	#N/A
LOC_Os08g39870	GH1	#N/A	Bradi3g40010.1;Bradi3g40010.2;Bradi3g40010.3
LOC_Os09g31410	GH1	Rice-diverged
LOC_Os09g31430	GH1	#N/A
LOC_Os09g33690	GH1	#N/A
LOC_Os11g08120	GH1	Rice-diverged
LOC_Os12g23170	GH1	#N/A	Bradi4g08040.1		Sb10g028060	GRMZM2G112704_P01
LOC_Os01g04290	GH10	#N/A	Bradi2g02330.1		Sb03g006980	GRMZM2G031004_P01
LOC_Os01g04300	GH10	#N/A	Bradi2g02320.1		Sb03g006950	GRMZM2G003794_P03;GRMZM2G003794_P04;GRMZM2G003794_P05
LOC_Os03g10469	GH10	#N/A	Bradi1g71050.1		Sb01g043730
LOC_Os03g47010	GH10	#N/A	Bradi1g12710.1		Sb01g012210	GRMZM2G002260_P01
LOC_Os05g23350	GH10	Rice-diverged
LOC_Os05g23830	GH10	Rice-diverged
LOC_Os05g25560	GH10	Rice-diverged
LOC_Os10g21100	GH10	Rice-diverged
LOC_Os02g03320	GH100	#N/A	Bradi3g02560.1		Sb04g002180	GRMZM2G477236_P03
LOC_Os11g07440	GH100	#N/A	Bradi4g24470.1		Sb05g004770	GRMZM2G007277_P01;GRMZM2G115451_P01;GRMZM2G115451_P02
LOC_Os01g25510	GH13	Rice-diverged
LOC_Os01g70700	GH14	Rice-diverged
LOC_Os07g35880	GH14	#N/A	Bradi1g25450.1		Sb02g035590	GRMZM2G112296_P01;GRMZM2G112296_P02;GRMZM2G112296_P03;GRMZM2G112296_P04
LOC_Os03g63760	GH16	#N/A	Bradi1g01150.1		Sb01g000710
LOC_Os04g51450	GH16	#N/A			Sb06g027660
LOC_Os04g51460	GH16	#N/A			Sb06g027670	GRMZM2G142857_P01;GRMZM2G392125_P01
LOC_Os04g51510	GH16	Rice-diverged
LOC_Os04g51520	GH16	#N/A	Bradi5g20720.1;Bradi5g20720.2;Bradi5g20720.3	11929.m00006
LOC_Os06g48170	GH16	#N/A	Bradi1g33820.1		Sb10g028560
LOC_Os08g13920	GH16	#N/A	Bradi1g09690.1;Bradi1g09700.1;Bradi3g18590.1	11929.m00001	Sb06g015880;Sb06g015930;Sb06g015940	GRMZM2G063566_P02;GRMZM2G119783_P01;GRMZM2G128876_P03;GRMZM2G364748_P01
LOC_Os08g13980	GH16	#N/A	Bradi3g18610.1		Sb07g007010	GRMZM2G062811_P01
LOC_Os08g14200	GH16	#N/A	Bradi3g18690.1		Sb07g007450	GRMZM2G104651_P01
LOC_Os08g14210	GH16	#N/A			Sb07g007460	GRMZM2G076157_P01
LOC_Os10g42670	GH16	#N/A			Sb01g027960	GRMZM2G070271_P01
LOC_Os01g71690	GH17	#N/A			Sb03g045520
LOC_Os03g12620	GH17	#N/A	Bradi1g69020.1		Sb01g041880	GRMZM2G012758_P01
LOC_Os03g40330	GH17	Rice-diverged
LOC_Os03g51240	GH17	#N/A			Sb01g009770	GRMZM2G096591_P01;GRMZM2G096591_P02
LOC_Os03g56130	GH17	Rice-diverged
LOC_Os05g37130	GH17	Rice-diverged
LOC_Os05g45860	GH17	#N/A	Bradi2g18700.1		Sb09g026690	GRMZM2G310739_P01
LOC_Os06g35920	GH17	Rice-diverged
LOC_Os07g13580	GH17	#N/A	Bradi1g53590.1		Sb02g007050
LOC_Os07g35350	GH17	#N/A	Bradi1g25530.1		Sb02g035490;Sb02g035520	GRMZM2G114140_P01;GRMZM2G454550_P01
LOC_Os07g35470	GH17	Rice-diverged
LOC_Os07g35480	GH17	#N/A	Bradi1g25530.1		Sb02g035490;Sb02g035520	GRMZM2G114140_P01;GRMZM2G454550_P01
LOC_Os07g35510	GH17	#N/A	Bradi1g25530.1		Sb02g035490;Sb02g035520	GRMZM2G114140_P01;GRMZM2G454550_P01
LOC_Os07g35520	GH17	#N/A	Bradi1g25530.1		Sb02g035490;Sb02g035520	GRMZM2G114140_P01;GRMZM2G454550_P01
LOC_Os07g35560	GH17	#N/A	Bradi1g25530.1		Sb02g035490;Sb02g035520	GRMZM2G114140_P01;GRMZM2G454550_P01
LOC_Os07g41014	GH17	Rice-diverged
LOC_Os08g14700	GH17	#N/A	Bradi1g25530.1		Sb02g035490;Sb02g035520	GRMZM2G114140_P01;GRMZM2G454550_P01
LOC_Os01g19750	GH18	#N/A			Sb01g050530
LOC_Os01g47070	GH18	#N/A	Bradi2g45610.1		Sb03g030100	GRMZM2G453805_P01
LOC_Os01g49320	GH18	Rice-diverged
LOC_Os01g64100	GH18	#N/A	Bradi2g55610.1;Bradi2g55620.1		Sb03g040570;Sb03g040580	GRMZM2G430942_P01
LOC_Os04g27980	GH18	Rice-diverged
LOC_Os05g15770	GH18	#N/A			Sb05g023700
LOC_Os05g15850	GH18	#N/A			Sb05g023700
LOC_Os05g15880	GH18	#N/A			Sb05g023700
LOC_Os05g15920	GH18	Rice-diverged
LOC_Os06g24990	GH18	#N/A			Sb05g023660;Sb05g023680
LOC_Os06g25010	GH18	#N/A	Bradi4g09430.1;Bradi4g09430.2		Sb02g004650	GRMZM2G162359_P01
LOC_Os07g23850	GH18	Rice-diverged
LOC_Os07g43820	GH18	Rice-diverged
LOC_Os08g40680	GH18	#N/A			Sb05g023690;Sb05g023710	GRMZM2G133781_P01
LOC_Os08g40690	GH18	Rice-diverged
LOC_Os08g40740	GH18	#N/A	Bradi4g40110.1;Bradi4g40120.1		Sb05g008530;Sb05g008550	GRMZM2G400999_P01;GRMZM2G447795_P01
LOC_Os10g28080	GH18	#N/A	Bradi3g26850.1		Sb05g006880	GRMZM2G057766_P01;GRMZM2G358153_P01
LOC_Os10g28120	GH18	#N/A	Bradi3g26840.1		Sb05g006880	GRMZM2G057766_P01;GRMZM2G358153_P01
LOC_Os11g47500	GH18	Rice-diverged
LOC_Os11g47510	GH18	#N/A				GRMZM2G400999_P01;GRMZM2G447795_P01		1
LOC_Os11g47520	GH18	#N/A			Sb05g023690;Sb05g023710	GRMZM2G133781_P01		2
LOC_Os11g47530	GH18	Rice-diverged
LOC_Os11g47550	GH18	Rice-diverged
LOC_Os11g47560	GH18	#N/A			Sb05g023690;Sb05g023710	GRMZM2G133781_P01
LOC_Os11g47570	GH18	#N/A			Sb05g023690;Sb05g023710	GRMZM2G133781_P01
LOC_Os11g47580	GH18	#N/A	Bradi4g40110.1;Bradi4g40120.1		Sb05g008530;Sb05g008550	GRMZM2G400999_P01;GRMZM2G447795_P01
LOC_Os11g47590	GH18	Rice-diverged
LOC_Os11g47600	GH18	Rice-diverged
LOC_Os11g47610	GH18	Rice-diverged
LOC_Os03g04060	GH19	#N/A			Sb01g048140	GRMZM2G099454_P01;GRMZM2G099470_P01
LOC_Os04g09390	GH19	#N/A	Bradi4g09740.1;Bradi4g09750.1
LOC_Os04g41640	GH19	#N/A	Bradi5g14420.1
LOC_Os05g33150	GH19	Rice-diverged
LOC_Os10g39680	GH19	#N/A	Bradi3g32340.1			GRMZM2G103668_P01
LOC_Os12g13610	GH19	Rice-diverged
LOC_Os12g15490	GH19	Rice-diverged
LOC_Os03g11980	GH20	#N/A	Bradi1g69660.1		Sb01g042640	GRMZM2G134251_P01
LOC_Os05g32410	GH20	Rice-diverged
LOC_Os07g26900	GH27	#N/A			Sb02g010650	GRMZM2G146463_P01;GRMZM2G146463_P02;GRMZM2G146463_P03
LOC_Os01g07790	GH28	#N/A	Bradi2g04520.1;Bradi2g04550.1		Sb03g004360	GRMZM2G054410_P01
LOC_Os01g36830	GH28	#N/A			Sb03g025260	GRMZM2G338158_P01
LOC_Os02g54030	GH28	Rice-diverged
LOC_Os03g11760	GH28	#N/A	Bradi1g69760.1	12928.m00006	Sb01g042735	GRMZM2G034835_P01
LOC_Os05g14150	GH28	Rice-diverged
LOC_Os05g50260	GH28	#N/A	Bradi2g14880.1
LOC_Os06g16810	GH28	Rice-diverged
LOC_Os06g28670	GH28	Rice-diverged
LOC_Os07g10730	GH28	Rice-diverged
LOC_Os11g14400	GH28	Rice-diverged
LOC_Os11g14410	GH28	Rice-diverged
LOC_Os01g56510	GH3	#N/A	Bradi2g51280.1;Bradi2g51280.2		Sb03g035970	AC197578.4_FGP001
LOC_Os02g03870	GH3	#N/A			Sb04g002560;Sb04g002570	GRMZM2G023986_P01;GRMZM2G023986_P02;GRMZM2G023986_P03
LOC_Os03g53790	GH3	#N/A	Bradi1g08580.1	12933.m00008	Sb01g008050	GRMZM2G473711_P01;GRMZM2G473711_P02
LOC_Os11g18690	GH3	Rice-diverged
LOC_Os03g52560	GH32	Rice-diverged
LOC_Os04g56920	GH32	#N/A			Sb06g031910	GRMZM2G018692_P01
LOC_Os04g56930	GH32	Rice-diverged
LOC_Os09g08072	GH32	#N/A	Bradi5g25270.1		Sb06g031930
LOC_Os09g08120	GH32	Rice-diverged
LOC_Os11g29945	GH33	Rice-diverged
LOC_Os06g37560	GH35	#N/A	Bradi1g37450.1		Sb10g022620	GRMZM2G027385_P01;GRMZM2G027385_P02;GRMZM2G081583_P01;GRMZM2G081583_P03
LOC_Os01g15410	GH36	#N/A			Sb01g001856
LOC_Os03g59430	GH36	#N/A		12749.m00004
LOC_Os08g26200	GH36	Rice-diverged
LOC_Os10g33070	GH36	Rice-diverged
LOC_Os03g61270	GH5	#N/A				GRMZM2G340257_P01
LOC_Os03g61280	GH5	#N/A	Bradi1g03210.1		Sb01g002630	GRMZM2G340257_P01
LOC_Os11g02600	GH5	Rice-diverged
LOC_Os12g02520	GH5	#N/A	Bradi4g44340.1		Sb05g001260	GRMZM2G051534_P01
LOC_Os03g20420	GH51	#N/A	Bradi1g63990.1;Bradi1g63990.2	12753.m00010	Sb02g043530	GRMZM2G180889_P01;GRMZM2G180889_P02
LOC_Os07g48750	GH51	Rice-diverged
LOC_Os11g03734	GH51	#N/A			Sb08g001500	GRMZM2G120132_P01
LOC_Os12g03480	GH51	Rice-diverged
LOC_Os12g03530	GH51	Rice-diverged
LOC_Os06g20130	GH85	Rice-diverged
LOC_Os01g64140	GH9	Rice-diverged
LOC_Os03g52630	GH9	Rice-diverged
LOC_Os05g03840	GH9	#N/A	Bradi2g38360.1		Sb09g002490	AC203408.4_FGP003
LOC_Os06g13830	GH9	Rice-diverged
LOC_Os06g50140	GH9	#N/A	Bradi1g35220.1		Sb10g030140	GRMZM2G153987_P01
LOC_Os12g24040	GH9	Rice-diverged
